# Supplementary material
Source: publisher figshare collection journal article supplement (https://gsajournals.figshare.com/articles/dataset/_/14738895)

Supplemental Figure 1.

A.

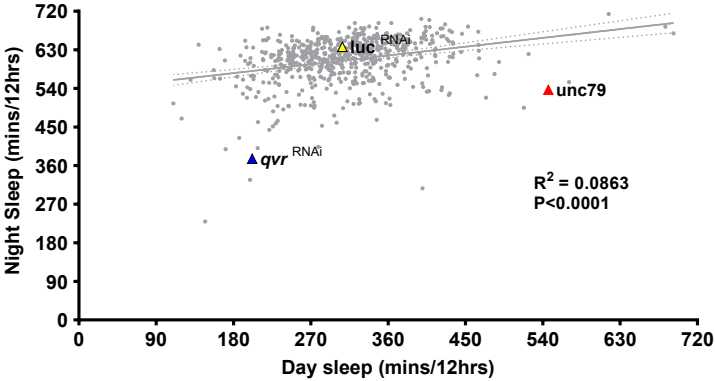

B.

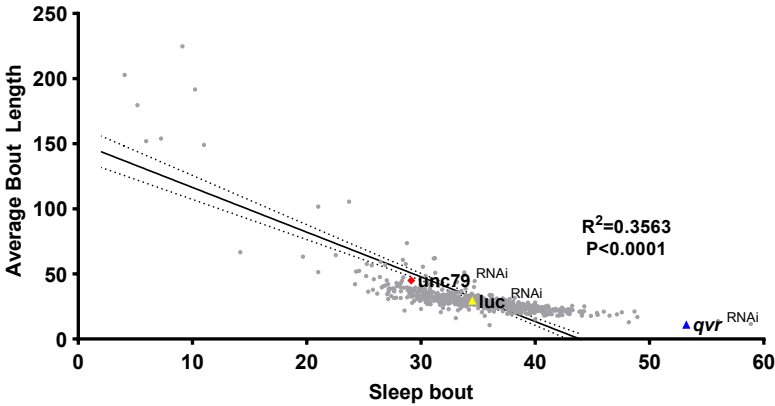

C.

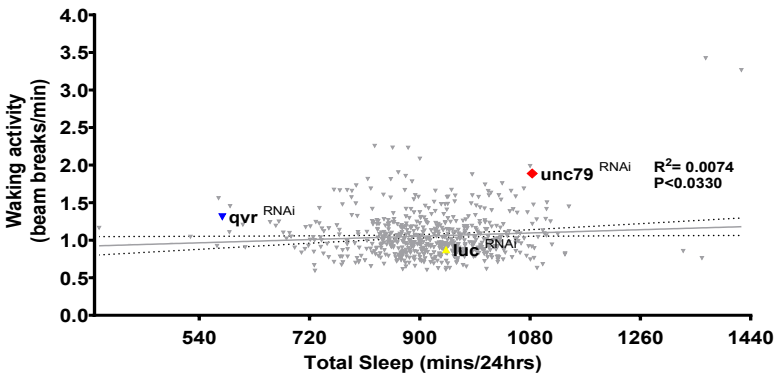

## Supplemental Figure 2.

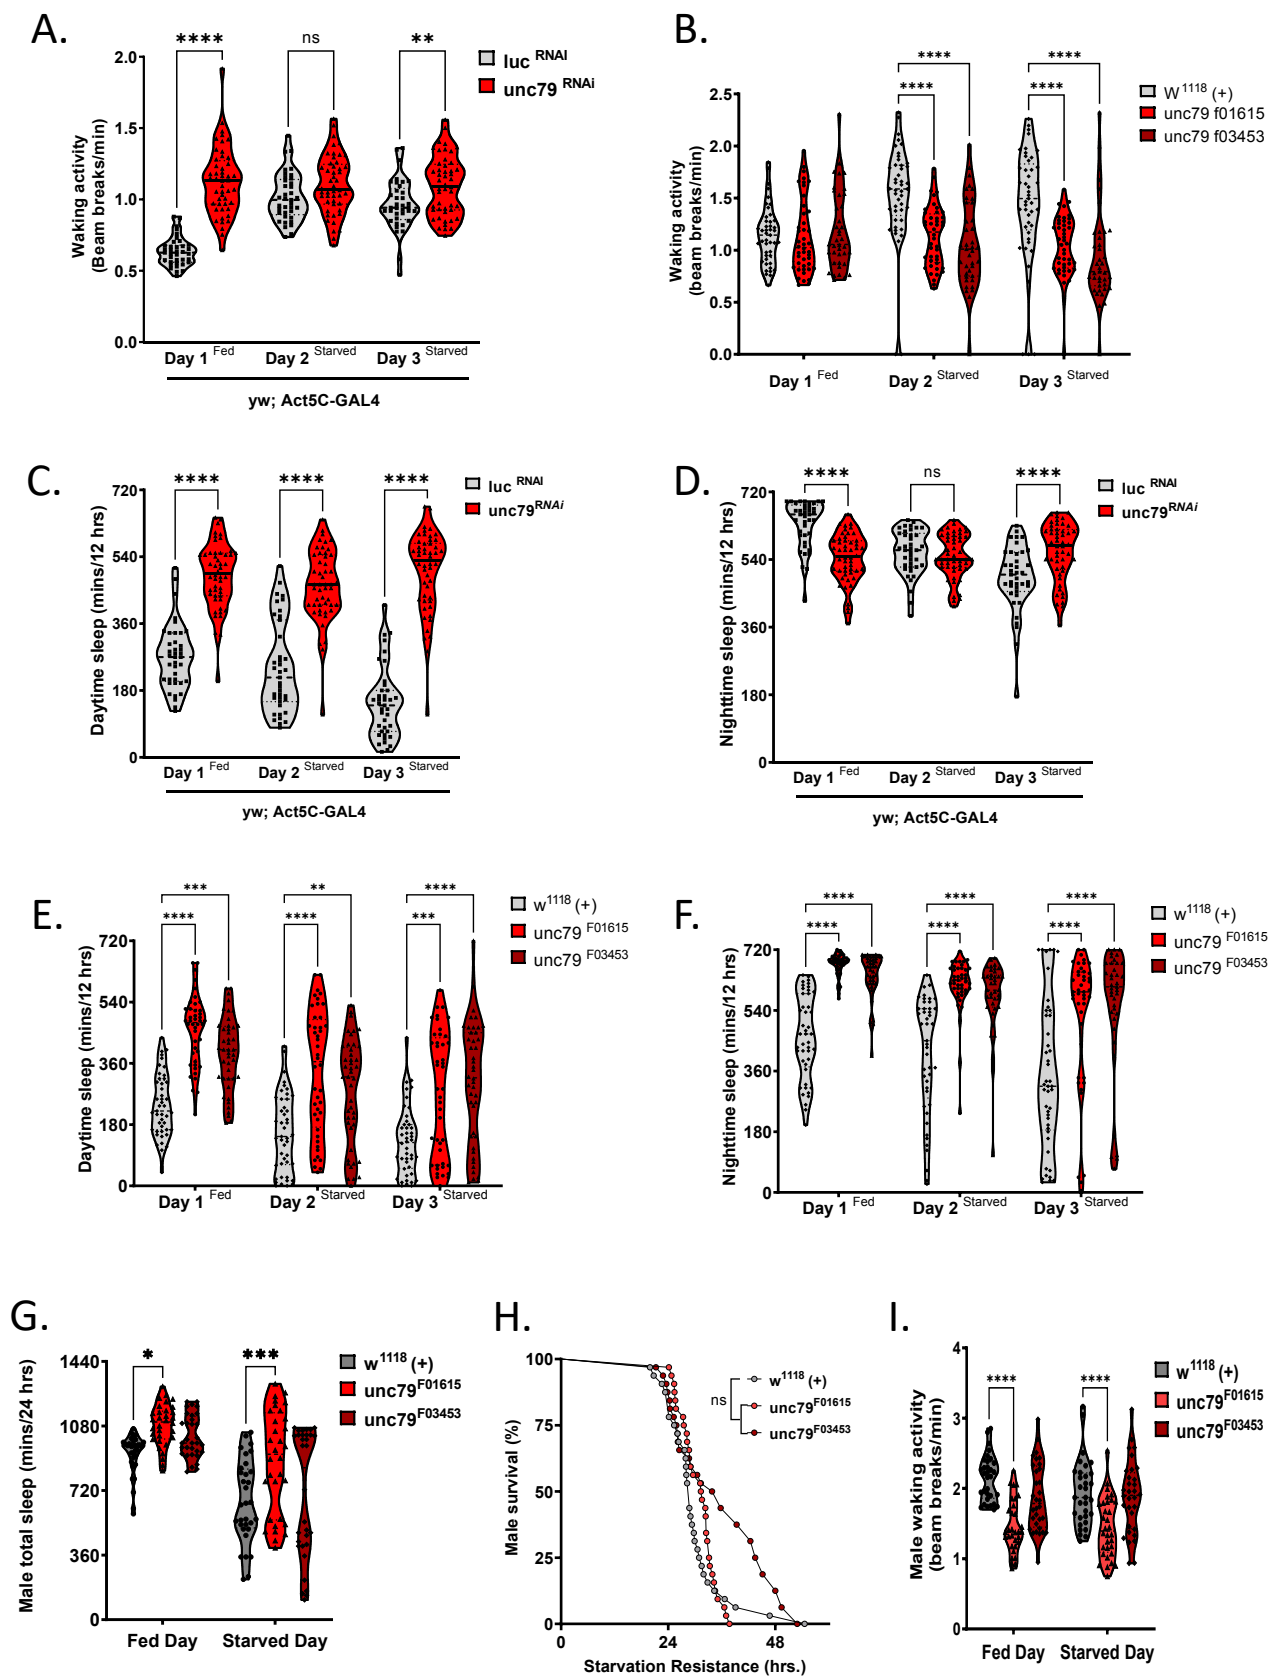

Supplemental Figure 3.

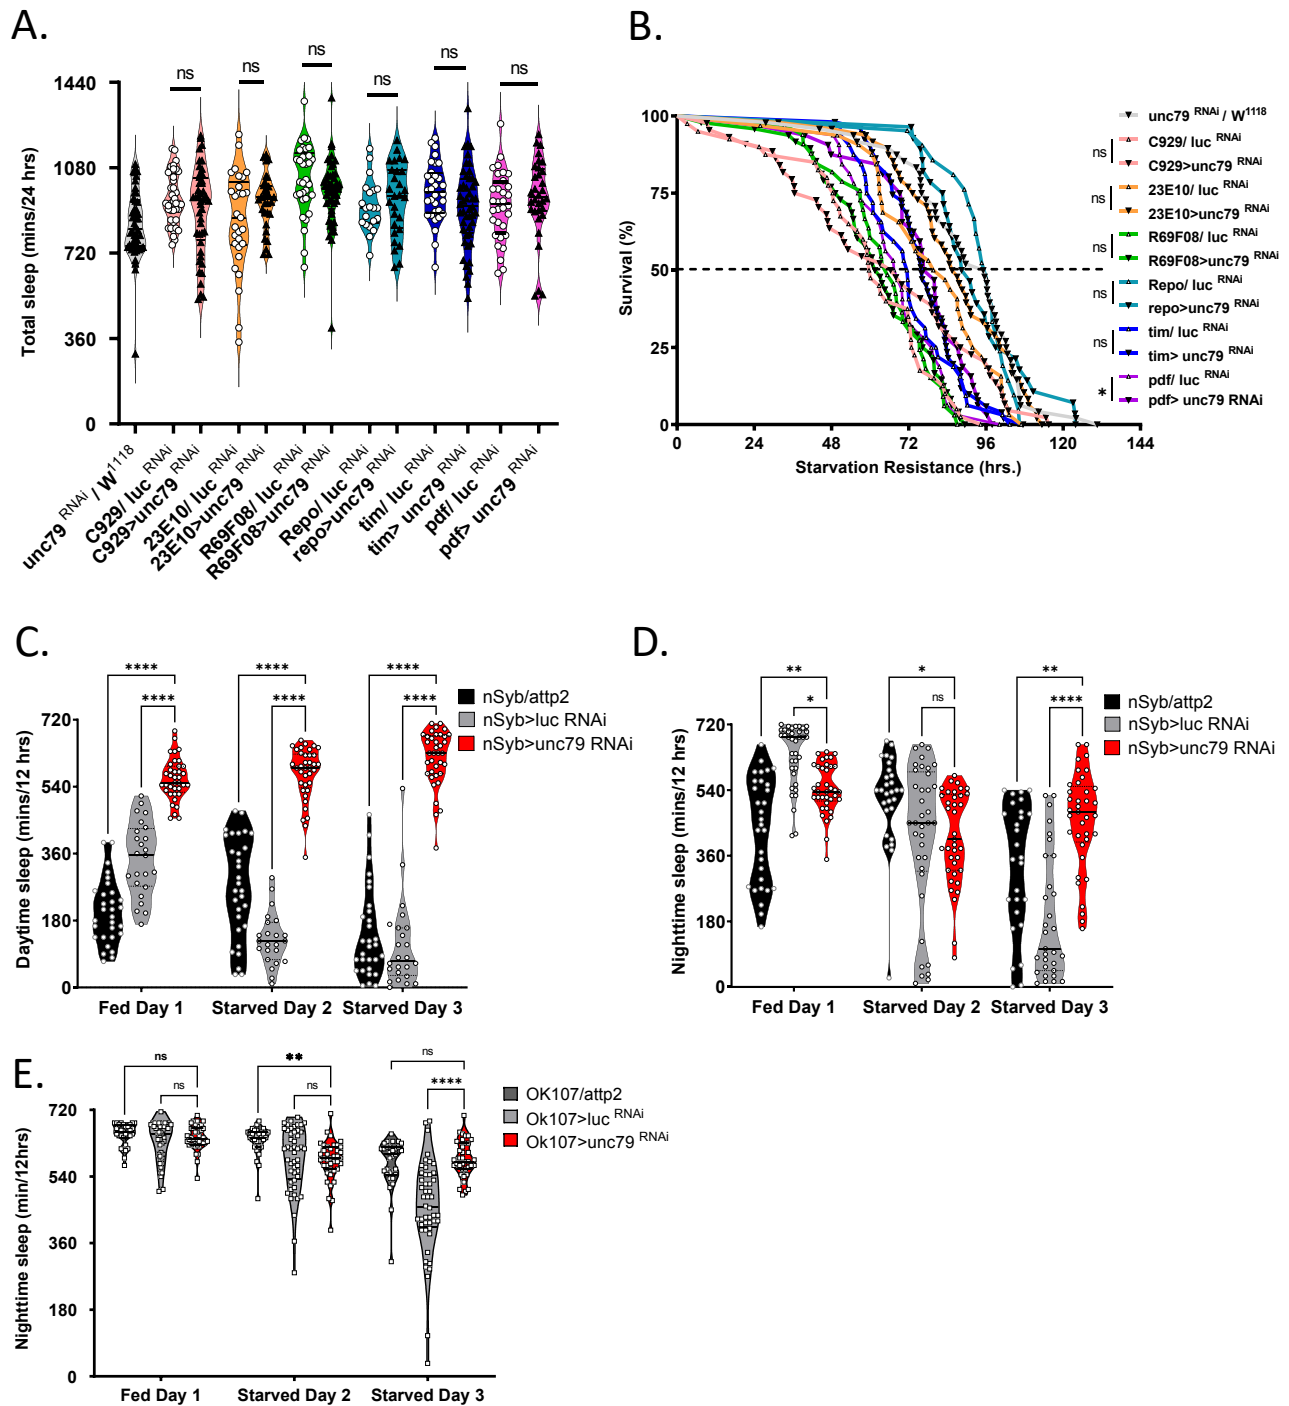

Supplemental Figure 4.

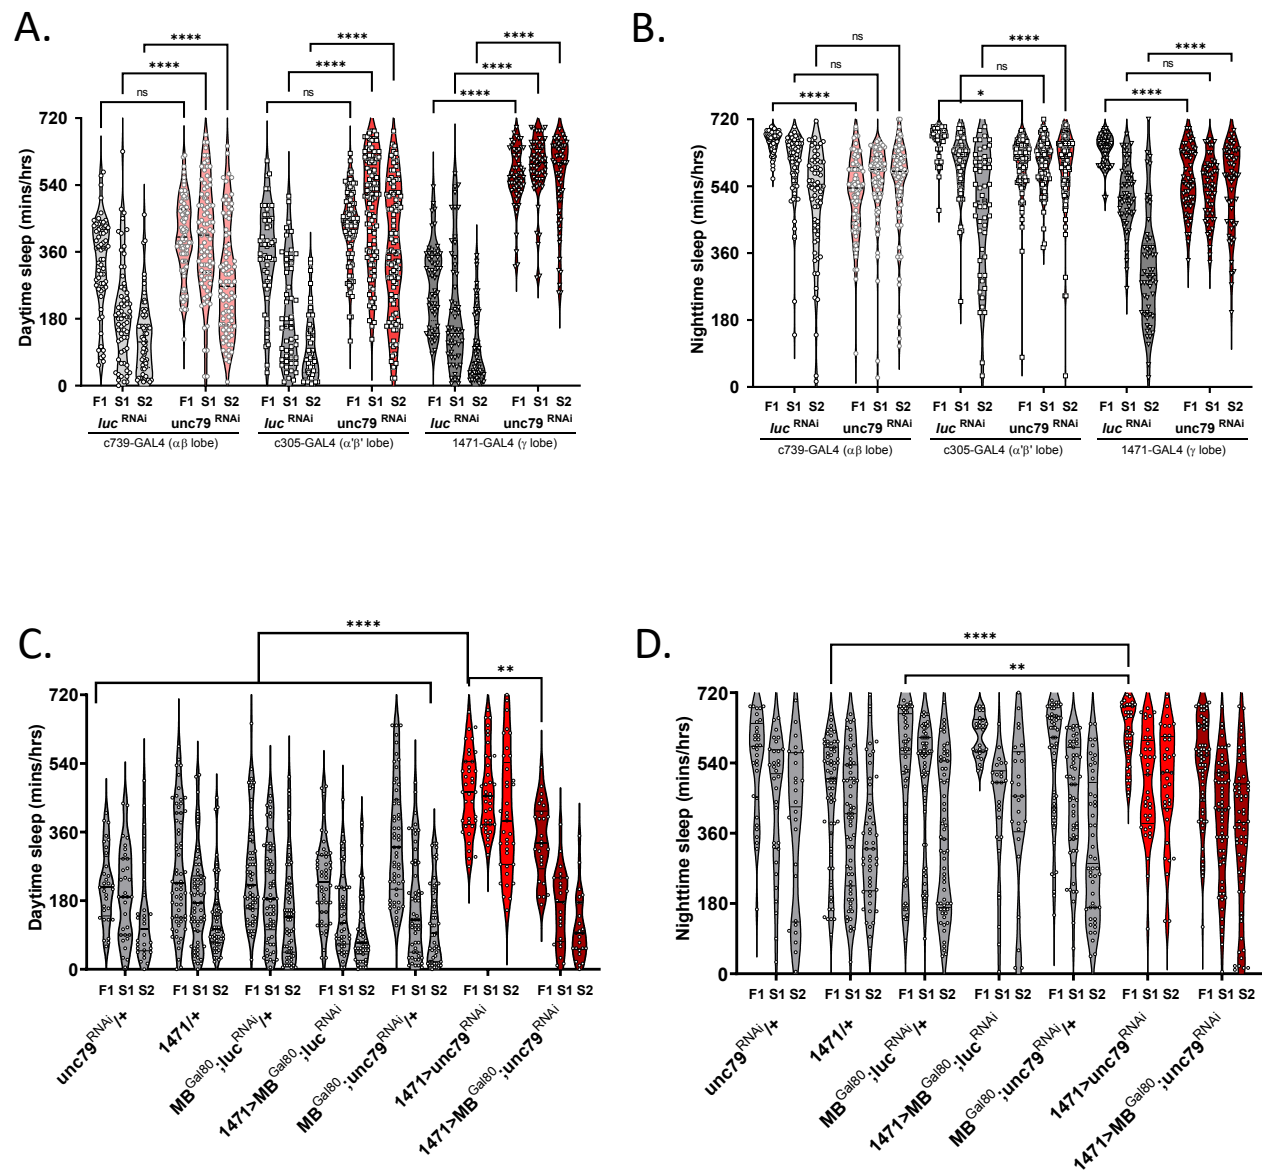



Supplemental Figure 5.

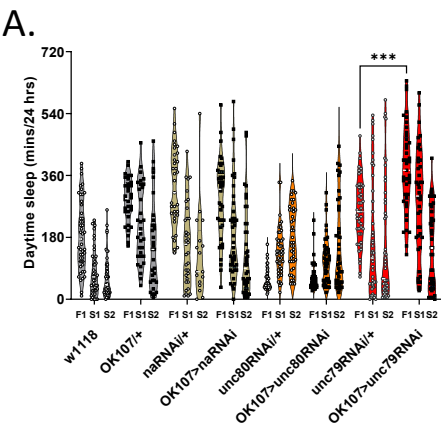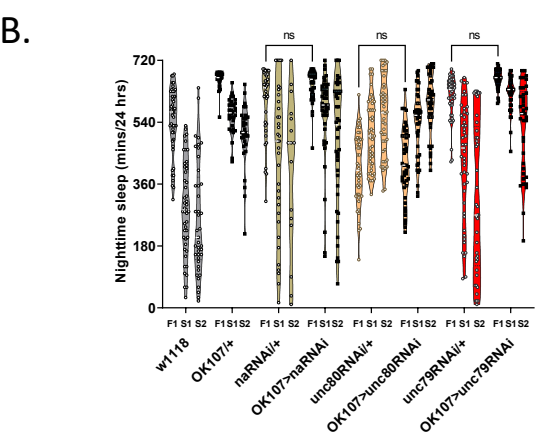

Supplement: Supplementary file 1 [file 2]
