# Supplementary material
Source: publisher figshare collection journal article supplement (https://gsajournals.figshare.com/articles/dataset/_/14738895)
Supplement: Supplementary file 2 [file 2]

| <b>REAGENT or RESOURCE</b>                    | <b>SOURCE IDENTIFIER</b> | <b>SOURCE</b>        | <b>IDENTIFIER</b> |
|-----------------------------------------------|--------------------------|----------------------|-------------------|
| Bloomington Formulation Nutri-fly food        |                          | Genesee Scientific   | 66-113            |
| Sucrose                                       |                          | Fisher Scientific    | S3-500            |
| Agar                                          |                          | Fisher Scientific    | BP1423-500        |
| Drosophila Activity Monitors (DAMs)           |                          | TriKinetics          | DAM2              |
| <b>Experimental Models: Organisms/Strains</b> |                          |                      |                   |
| P{Act5C-GAL4-w}E1                             |                          | BDSC                 | 25374             |
| P{TriP.JF01355}attP2                          |                          | BDSC                 | 31603             |
| P{TriP.HMC03213}attP2                         |                          | BDSC                 | 51471             |
| PBac{WH}unc79[f03453]                         |                          | BDSC                 | 18655             |
| Pbac{WH}unc79[f01615]                         |                          | Lear                 | f01615            |
| P{CaryP }attP2                                |                          | BDSC                 | 36303             |
| P{GMR57C10-GAL4}attP2                         |                          | BDSC                 | 39171             |
| P{GawB}OK107                                  |                          | BDSC                 | 854               |
| P{GawB}Hr39[c739]                             |                          | BDSC                 | 7362              |
| P{GawB}Cka[c305a]                             |                          | BDSC                 | 30829             |
| P{GawB}1471                                   |                          | BDSC                 | 9465              |
| P{GAL4-tim.E}62                               |                          | BDSC                 | 7126              |
| P{PDF-GAL4/cyo}                               |                          | Tomchik              | N/A               |
| P{GawB}dimm[929]                              |                          | BDSC                 | 25373             |
| P{GAL4}repo                                   |                          | BDSC                 | 7415              |
| P{GMR69F08-GAL4}attP2                         |                          | BDSC                 | 39499             |
| P{GMR23E10-GAL4}attP2                         |                          | BDSC                 | 49032             |
| P{mb247-GAL80.T}2                             |                          | BDSC                 | 68265             |
| w1118; P{GD11587}                             |                          | VDRC                 | v45780            |
| w1118; P{GD330}v1309                          |                          | VDRC                 | v1309             |
| w1118; P{GD1172}v3306                         |                          | VDRC                 | v3306             |
| <b>Software and Algorithms</b>                |                          |                      |                   |
| MS Powerpoint                                 |                          | Microsoft office     | v 2016            |
| MS Excel                                      |                          | Microsoft Office     | v 2016            |
| DAMs Activity Software                        |                          | TriKinetics          | v 3.08            |
| Drosophila Counting Macro                     |                          | Keegan and Lee       | v 5.19.9 2010     |
| Prism                                         |                          | Graphpad software    | v 9               |
| Clocklab                                      |                          | ActiMetrics sofeware | v 2.72            |
